# Supplementary material
Source: Springer Nature journal article supplement (https://www.springermedizin.de/resource/supplementary/12970_2007_47_MOESM6_ESM.pdf/9594242)
Supplement: MOESM6 [file 9594242]

| Agent                                  | Prevalence          | Rating** |
|----------------------------------------|---------------------|----------|
| Anadrol (oxymetholone)*                | 37.7%<br>(n = 753)  | 3.6      |
| Anavar (oxandrolone)*                  | 37%<br>(n = 724)    | 3.8      |
| Clenbuterol^                           | 49.5%<br>(n = 967)  | 3.4      |
| Dianabol (methandrostenolone)*         | 64.9%<br>(n = 1269) | 4        |
| Deca Durabolin (nandrolone decanoate)* | 63.5%<br>(n = 1242) | 4        |
| Dynabol (nandrolone undecanoate)*      | 19.8%<br>(n = 388)  | 3.3      |
| Equipoise (boldenone undecanoate)*     | 53.9%<br>(n = 1053) | 4        |
| Furzabol*                              | 12.2%<br>(n = 238)  | 2.6      |
| Halotestin (fluoxymesterone)*          | 19.4%<br>(n = 380)  | 3        |
| Human Growth Hormone`                  | 27.9%<br>(n = 545)  | 4.1      |
| IGF-1`                                 | 19.4%<br>(n = 380)  | 3.8      |
| Masterone (drostanolone)*              | 20%<br>(n = 391)    | 3.7      |
| Methyltestosterone*                    | 26.1%<br>(n = 346)  | 2.7      |
| Primobolan (methenolone)*              | 28.2%<br>(n = 551)  | 3.7      |
| Insulin`                               | 21.5%<br>(n = 421)  | 3.6      |
| Multi Ester Testosterone*              | 56%<br>(n = 1094)   | 4.4      |
| Single Ester Testosterone*             | 78.2%<br>(n = 1529) | 4.7      |
| T3/T4^                                 | 37%<br>(n = 722)    | 3.5      |
| Trenbolone*                            | 51.3%<br>(n = 1002) | 4.5      |
| Winstrol (stanozolol)*                 | 56%<br>(n = 1094)   | 3.8      |

\*=AAS

^=thermogenic agent

`=peptide

\*\* rating scale = 1 (very poor), 2(poor), 3 (acceptable), 4 (good), 5 (very good)
